# Supplementary material
Source: PubMed Central journal article supplement (PMC5181682)
Supplement: supp_gkw351_nar-00060-v-2016-File008.pdf [file supp_gkw351_nar-00060-v-2016-File008.pdf]

## Supplemental Experimental Procedures

### Secondary structure of TIP protein

Circular dichroism (CD) spectrum was collected on the expressed TIP protein that contained a His-tag (His-TIP) (1) and the TIP peptide (residues 28-64) using a Chirascan CD spectrometer (Applied Photophysics LTD, Surrey, UK). The His-TIP CD data was collected using a 1 mm quartz cell over a wavelength range of 200-280 nm. TIP peptide CD data were collected using a 0.1 mm quartz cell over a wavelength range of 180-280 nm. All CD data were collected at 25°C using 1 nm steps and 5 s averaging per data point. Data were converted to mean residue molar ellipticity ( $\text{deg cm}^2/\text{dmol}$ ) after baseline subtraction of the buffer. The His-TIP protein was prepared for CD and NMR by dialyzing into phosphate buffer containing 50 mM  $\text{NaPO}_4$  (pH 7.2), 0.3 M NaCl. Protein concentrations were determined using UV absorbance at 280 nm. The synthesized TIP peptide was dissolved in water. NMR spectra of uniformly  $^{15}\text{N}$ -labeled TIP protein were collected on a Bruker 600 MHz spectrometer equipped with a Cryoprobe (Billerica, MA, USA). The CD spectra of His-TIP and TIP peptide were very similar (data not shown).

The TIP protein is largely unstructured in solution. Secondary structure analysis using circular dichroism showed His-TIP contained ~15%  $\alpha$ -helix and ~48% random coil, while TIP peptide (residues 28-64) contains ~22% helix and ~33% random coil (Supplemental Figure S1A) [determined using CDNN (2)]. The lack of much spectral dispersion for the amide resonances in the HSQC spectrum (Supplemental Figure S1B) is consistent with the CD data. TIP does maintain a small amount of helicity by itself, which is apparently stabilized when binding to PCNA. TIP in the PCNA:TIP complex contains 33%  $\alpha$ -helix.

### Size exclusion chromatography of PCNA and PCNA complexes

Size exclusion chromatography was run prior to SAXS analysis as an additional purification step and to obtain a mono-disperse sample for accurate scattering measurements. Size exclusion chromatography results show that PCNA:TIP has an apparent molecular mass of 39 kDa, indicative of a monomer, whereas the free PCNA protein elutes as 109 kDa, consistent with the expected trimer (Supplemental Table S1). For PCNA:FEN-1 complex, the apparent molecular mass is 105 kDa, a result close to the 109 kDa for the free PCNA trimer (Supplemental Table S1). PCNA proteins and PCNA:peptide complexes were run on an ÄKTA purifier using a

Superdex-200 10/300 GL column (GE Healthcare Bio-Sciences, Pittsburgh, PA) as described in Material and Methods at 0.5 ml/min flow rate at 22°C. Half milliliter samples containing 20-200  $\mu$ M protein were loaded onto the column and 0.5 ml fractions were collected. Molecular weight was determined using a standard curve and Gel Filtration standard (Bio-Rad, Hercules, CA).

## Supplemental Figures and Tables

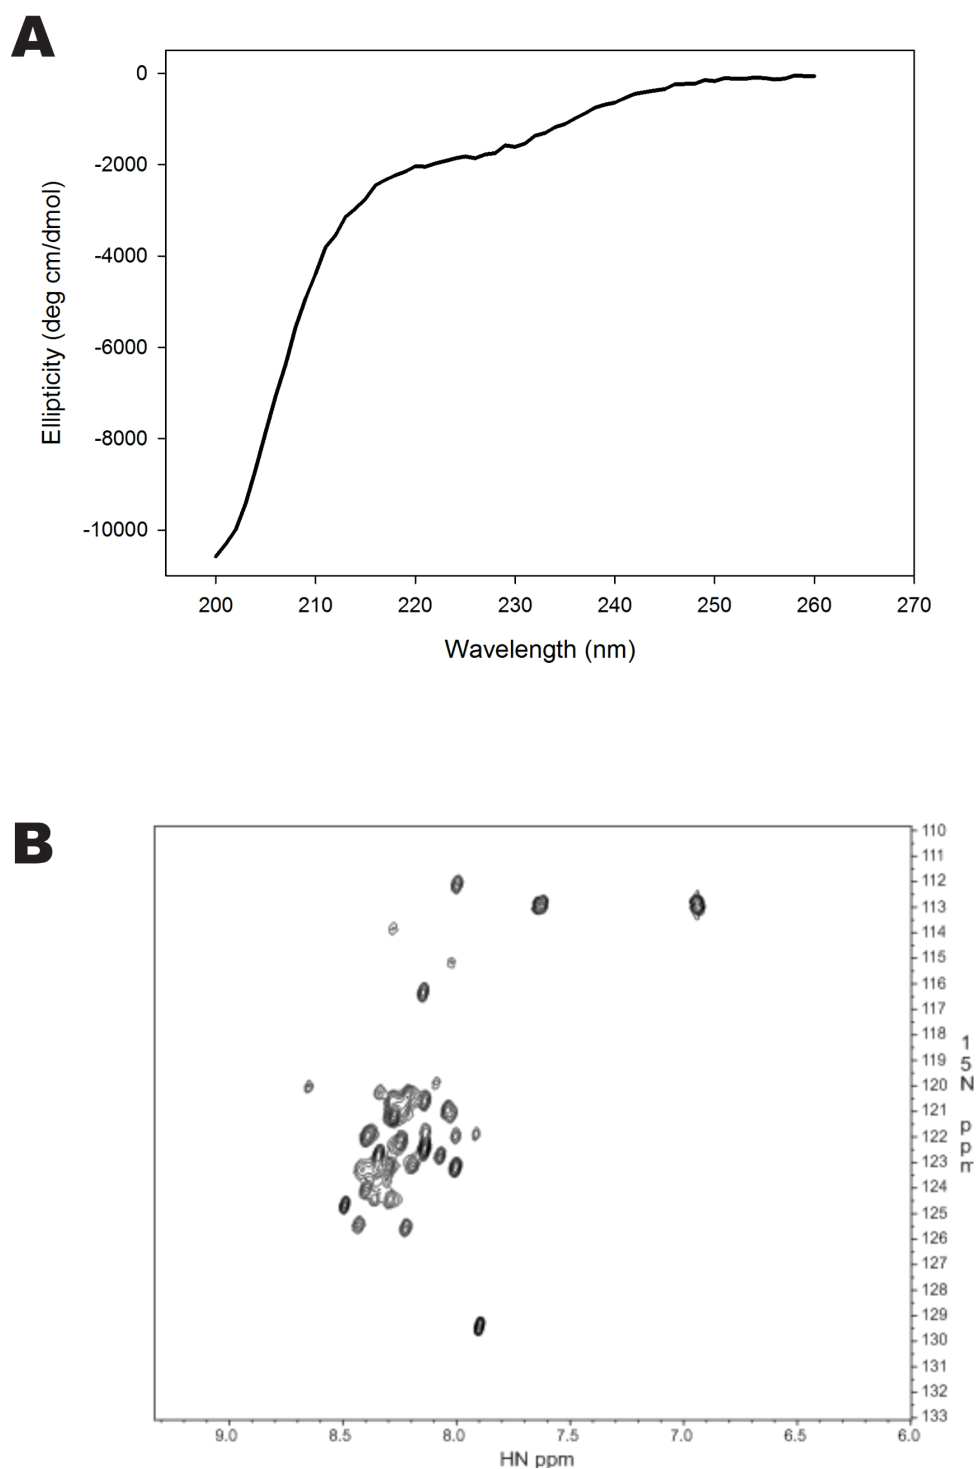

**Figure S1:** The TIP protein is partially disordered. A. The observed circular dichroism spectrum of His-TIP shows very little secondary structure. B. The  $^1\text{H}$ - $^{15}\text{N}$  HSQC 2D NMR spectrum of the TIP protein in the same buffer. The lack of proton chemical shift dispersion for a 64-residue protein indicates the TIP protein is not well folded.

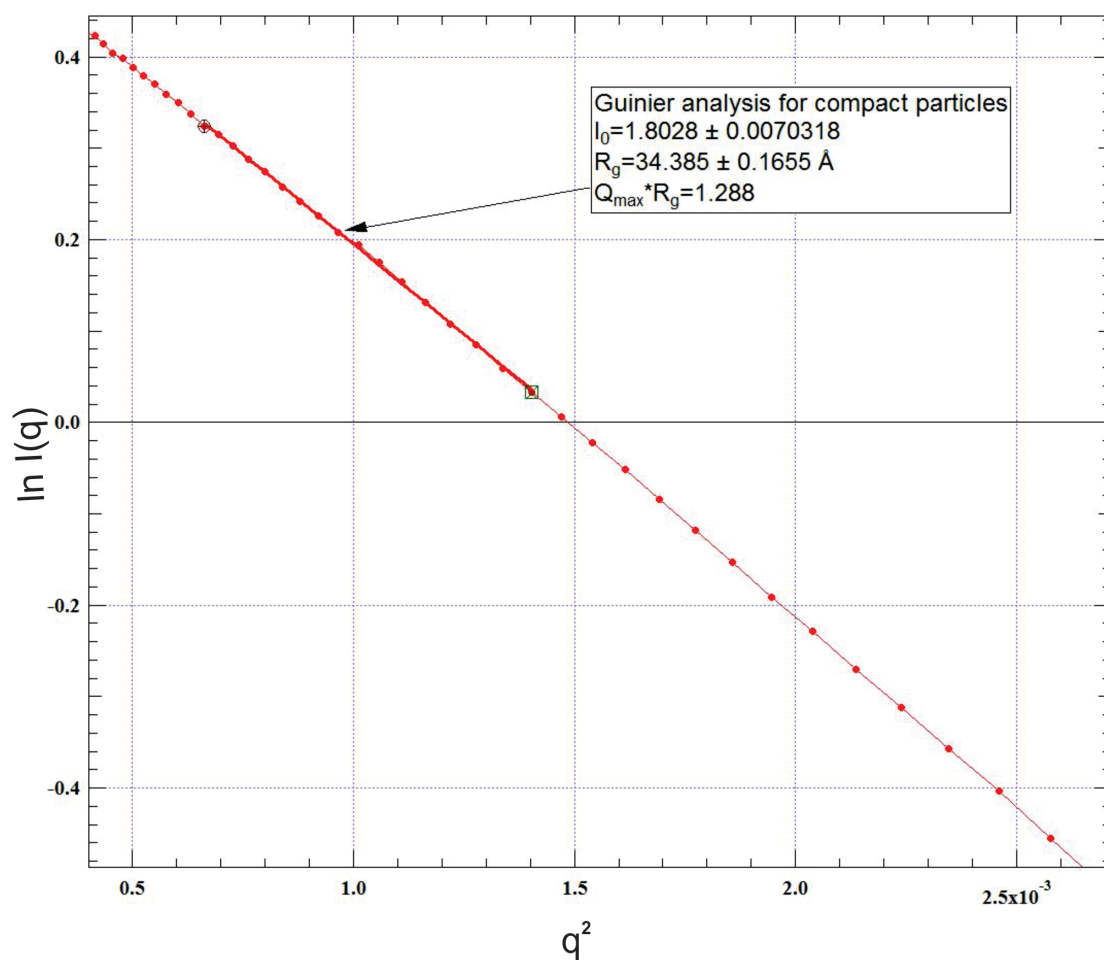

Figure S2: Example of a Guinier fit of the SAXS data to obtain  $I_0$  and  $R_g$  for PCNA:FEN-1. Guinier fits were obtained by taking the natural logarithm of  $I(q) = I_0 \exp(-q^2 R_g^2/3)$ , an approximation that is valid for values of  $Q_{\text{max}} * R_g < 1.3$ .

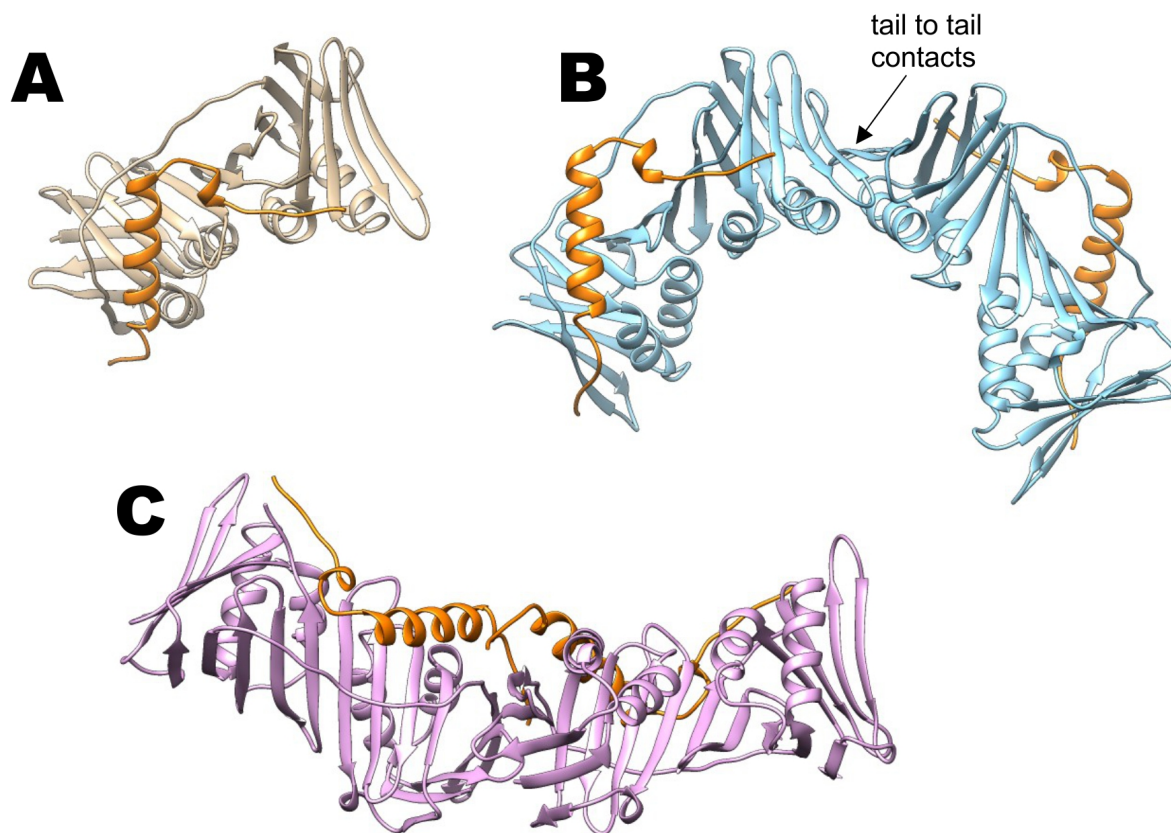

**Figure S3.** Ribbon figure of the models used in fitting the solution SAXS data for PCNA:TIP. Model A, PCNA:TIP (1:1) complex; Model B, two PCNA:TIP molecules that make crystallographic contacts between neighboring unit cells; Model C, two copies of TIP in the asymmetric unit. Although the protein-protein contacts in Model C do not make stable intermolecular interactions, this model was used as an approximation to a more linear 2:2 complex.

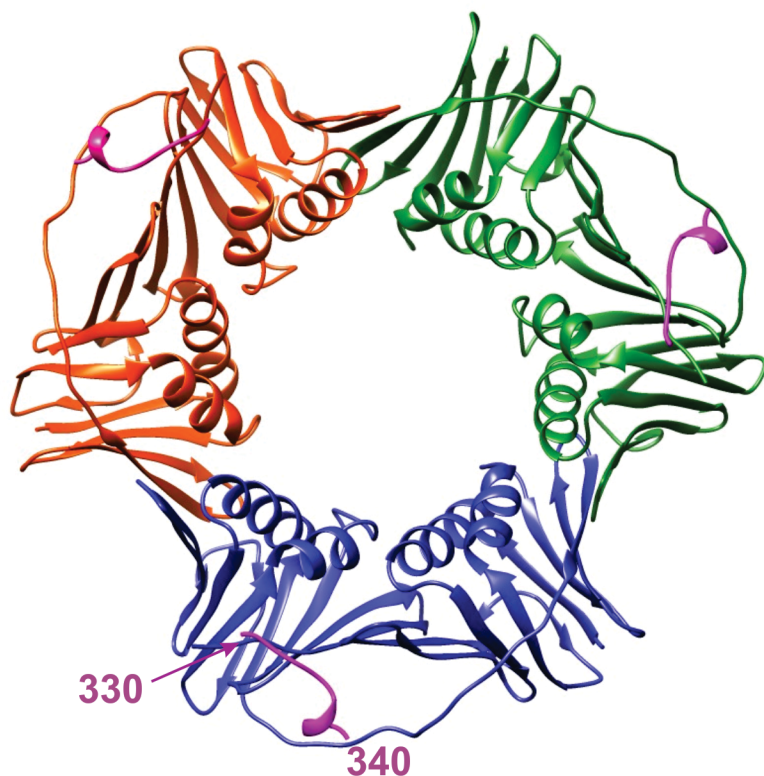

Figure S4. X-ray crystal structure of PCNA bound to the FEN-1 derived peptide. A peptide consisted of residues 330-340 of the *T. kodakarensis* FEN-1 protein (encoded by the TK1281 gene) was crystallized with PCNA (PDBid: 5DAI). The FEN-1 peptides are shown in magenta.

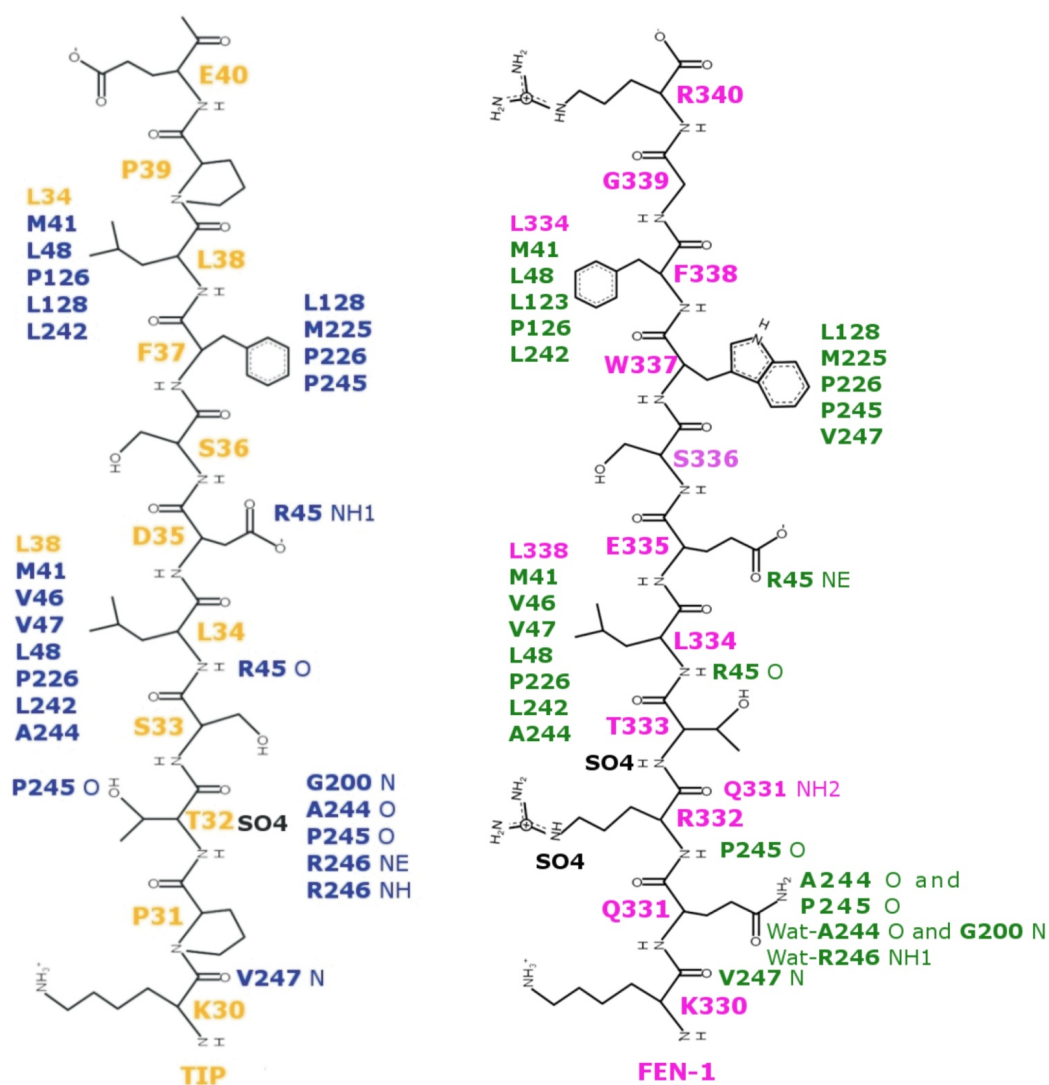

Figure S5. Schematic representation of the canonical (FEN-1) and non-canonical (TIP) PIP motifs interactions in the PIP binding site of PCNA. The central backbone in the figure is the PIP motif. PCNA:TIP is on the left and PCNA:FEN-1 is on the right. Residues labeled in gold are TIP residues at the PIP binding site. PCNA residues that interact with the PIP site are labeled in blue for the PCNA:TIP complex. FEN-1 residues are labeled in pink, while PCNA residues interacting with FEN-1 are shown in green.

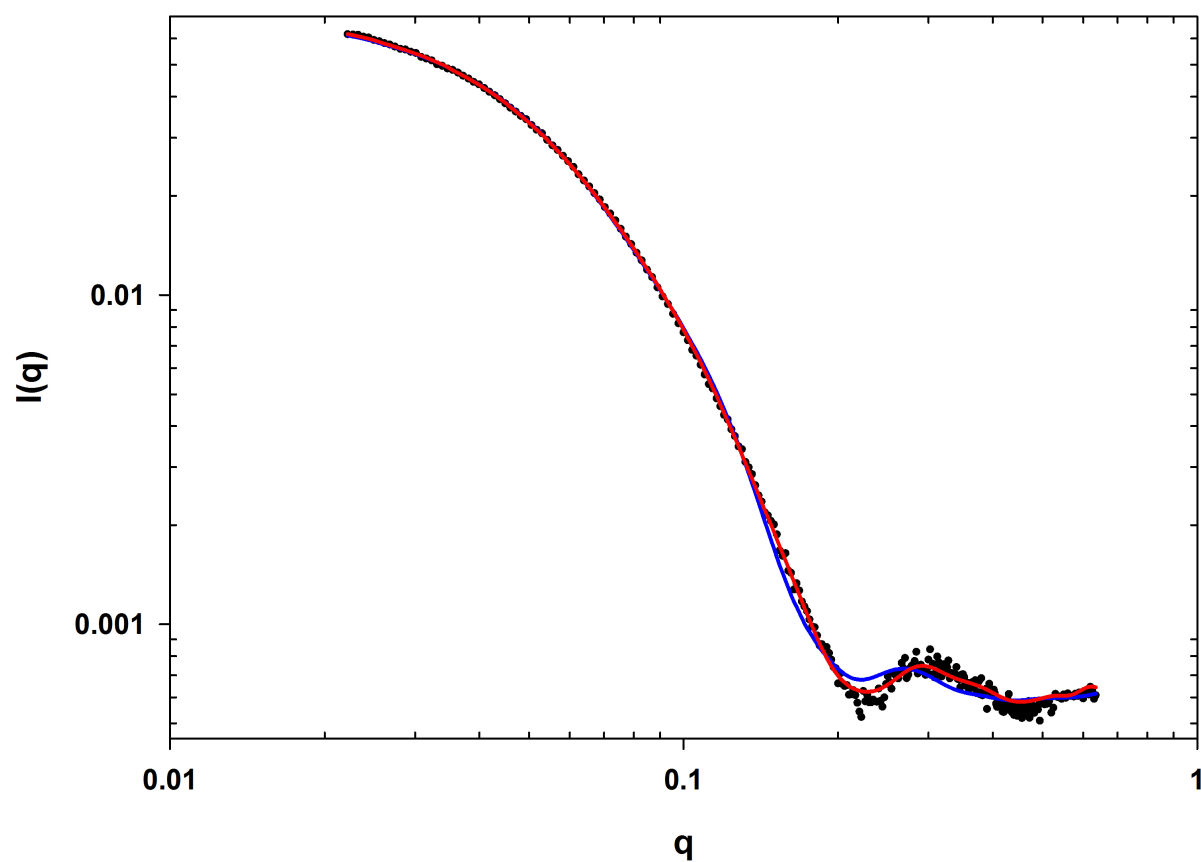

Figure S6. Comparison of modeled SAXS data for an equilibrium fit between Models A and B (blue line,  $\chi \sim 0.41$ ) and Models A and C (red line,  $\chi \sim 0.23$ ) (Supplemental Figure S3). The experimental SAXS data shown here (data points) was collected at 4.1 mg/ml, where the signal to noise is sufficient to distinguish between the models.

Table S1. Size determination of PCNA proteins and complexes.

|                    | Retention time<br>(ml) | MW measured<br>(kDa) | MW calculated<br>(kDa) |
|--------------------|------------------------|----------------------|------------------------|
| PCNA               | 15.5                   | 109                  | 30                     |
| PCNA:TIP (28-64)   | 17.0                   | 39                   | 34                     |
| PCNA:FEN-1 peptide | 15.6                   | 105                  | 31                     |
| mPCNA              | 17.4                   | 29                   | 30                     |

Table S2. Invariants from Guinier analysis of experimental SAXS data<sup>1</sup>

|                    | Concentration <sup>2</sup><br>(mg/ml) | Rg <sup>3</sup><br>(Å) | Io <sup>3</sup> | Io/c  |
|--------------------|---------------------------------------|------------------------|-----------------|-------|
| Monomeric PCNA     | 1.8                                   | 25.1±2.6               | 0.131±0.002     | 0.073 |
| PCNA <sup>4</sup>  | 2.7                                   | 35.4±0.2               | 0.079±0.005     | 0.029 |
|                    | 2.0                                   | 35.4±0.9               | 0.058±0.001     | 0.029 |
| PCNA:TIP peptide   | 6.4                                   | 30.4±0.1               | 0.475±0.004     | 0.074 |
|                    | 4.8                                   | 29.3±2.8               | 0.326±0.005     | 0.068 |
|                    | 4.1 <sup>4</sup>                      | 32.0±0.3               | 0.074±0.001     | 0.018 |
|                    | 2.1 <sup>4</sup>                      | 27.7±0.3               | 0.028±0.001     | 0.013 |
| PCNA:FEN-1 peptide | 7.3                                   | 33.4±1.1               | 1.770±0.007     | 0.024 |
|                    | 5.5                                   | 35.1±0.1               | 1.340±0.008     | 0.024 |
|                    | 4.6 <sup>4</sup>                      | 37.9±0.5               | 0.242±0.004     | 0.053 |
|                    | 2.3 <sup>4</sup>                      | 37.2±0.1               | 0.116±0.003     | 0.050 |

<sup>1</sup> The Qmax\*Rg was ≤ 1.3 for all Guinier analyses.

<sup>2</sup> The errors in protein concentration are estimated to be 10-20%.

<sup>3</sup> Reported ± error in Rg and Io is the standard deviation from AutoRg in Primus.

<sup>4</sup> SAXS data for PCNA, PCNA:TIP at 4.1 and 2.1 mg/ml and PCNA:FEN-1 at 4.6 and 2.3 mg/ml PCNA:FEN-1 were collected on a different date using a similar experimental setup.

Table S3. Interface areas between PCNA and PCNA complexes in Å<sup>2</sup>.

| <u>Interface between PCNA domains I and II</u> |      |
|------------------------------------------------|------|
| PCNA alone                                     | 814  |
| With TIP protein                               | 738  |
| With FEN-1 peptide                             | 839  |
| <br><u>Interface of complexes</u>              |      |
| PCNA:TIP protein                               | 1486 |
| PCNA:FEN-1 peptide                             | 581  |

## Supplemental References

1. Ladner, J.E., Pan, M., Hurwitz, J. and Kelman, Z. (2011) Crystal structures of two active proliferating cell nuclear antigens (PCNAs) encoded by *Thermococcus kodakaraensis*. *Proc Natl Acad Sci U S A*, **108**, 2711-2716.
2. Böhm, G., Muhr, R. and Jaenicke, R. (1992) Quantitative analysis of protein far UV circular dichroism spectra by neural networks. *Protein Eng*, **5**, 191-195.
